# Supplementary material for: Patterns of Linkage Disequilibrium and Long Range Hitchhiking in Evolving Experimental Drosophila melanogaster Populations
Source: PubMed Central journal article supplement (PMC4298179; doi:10.1093/molbev/msu320), 2014-11-17

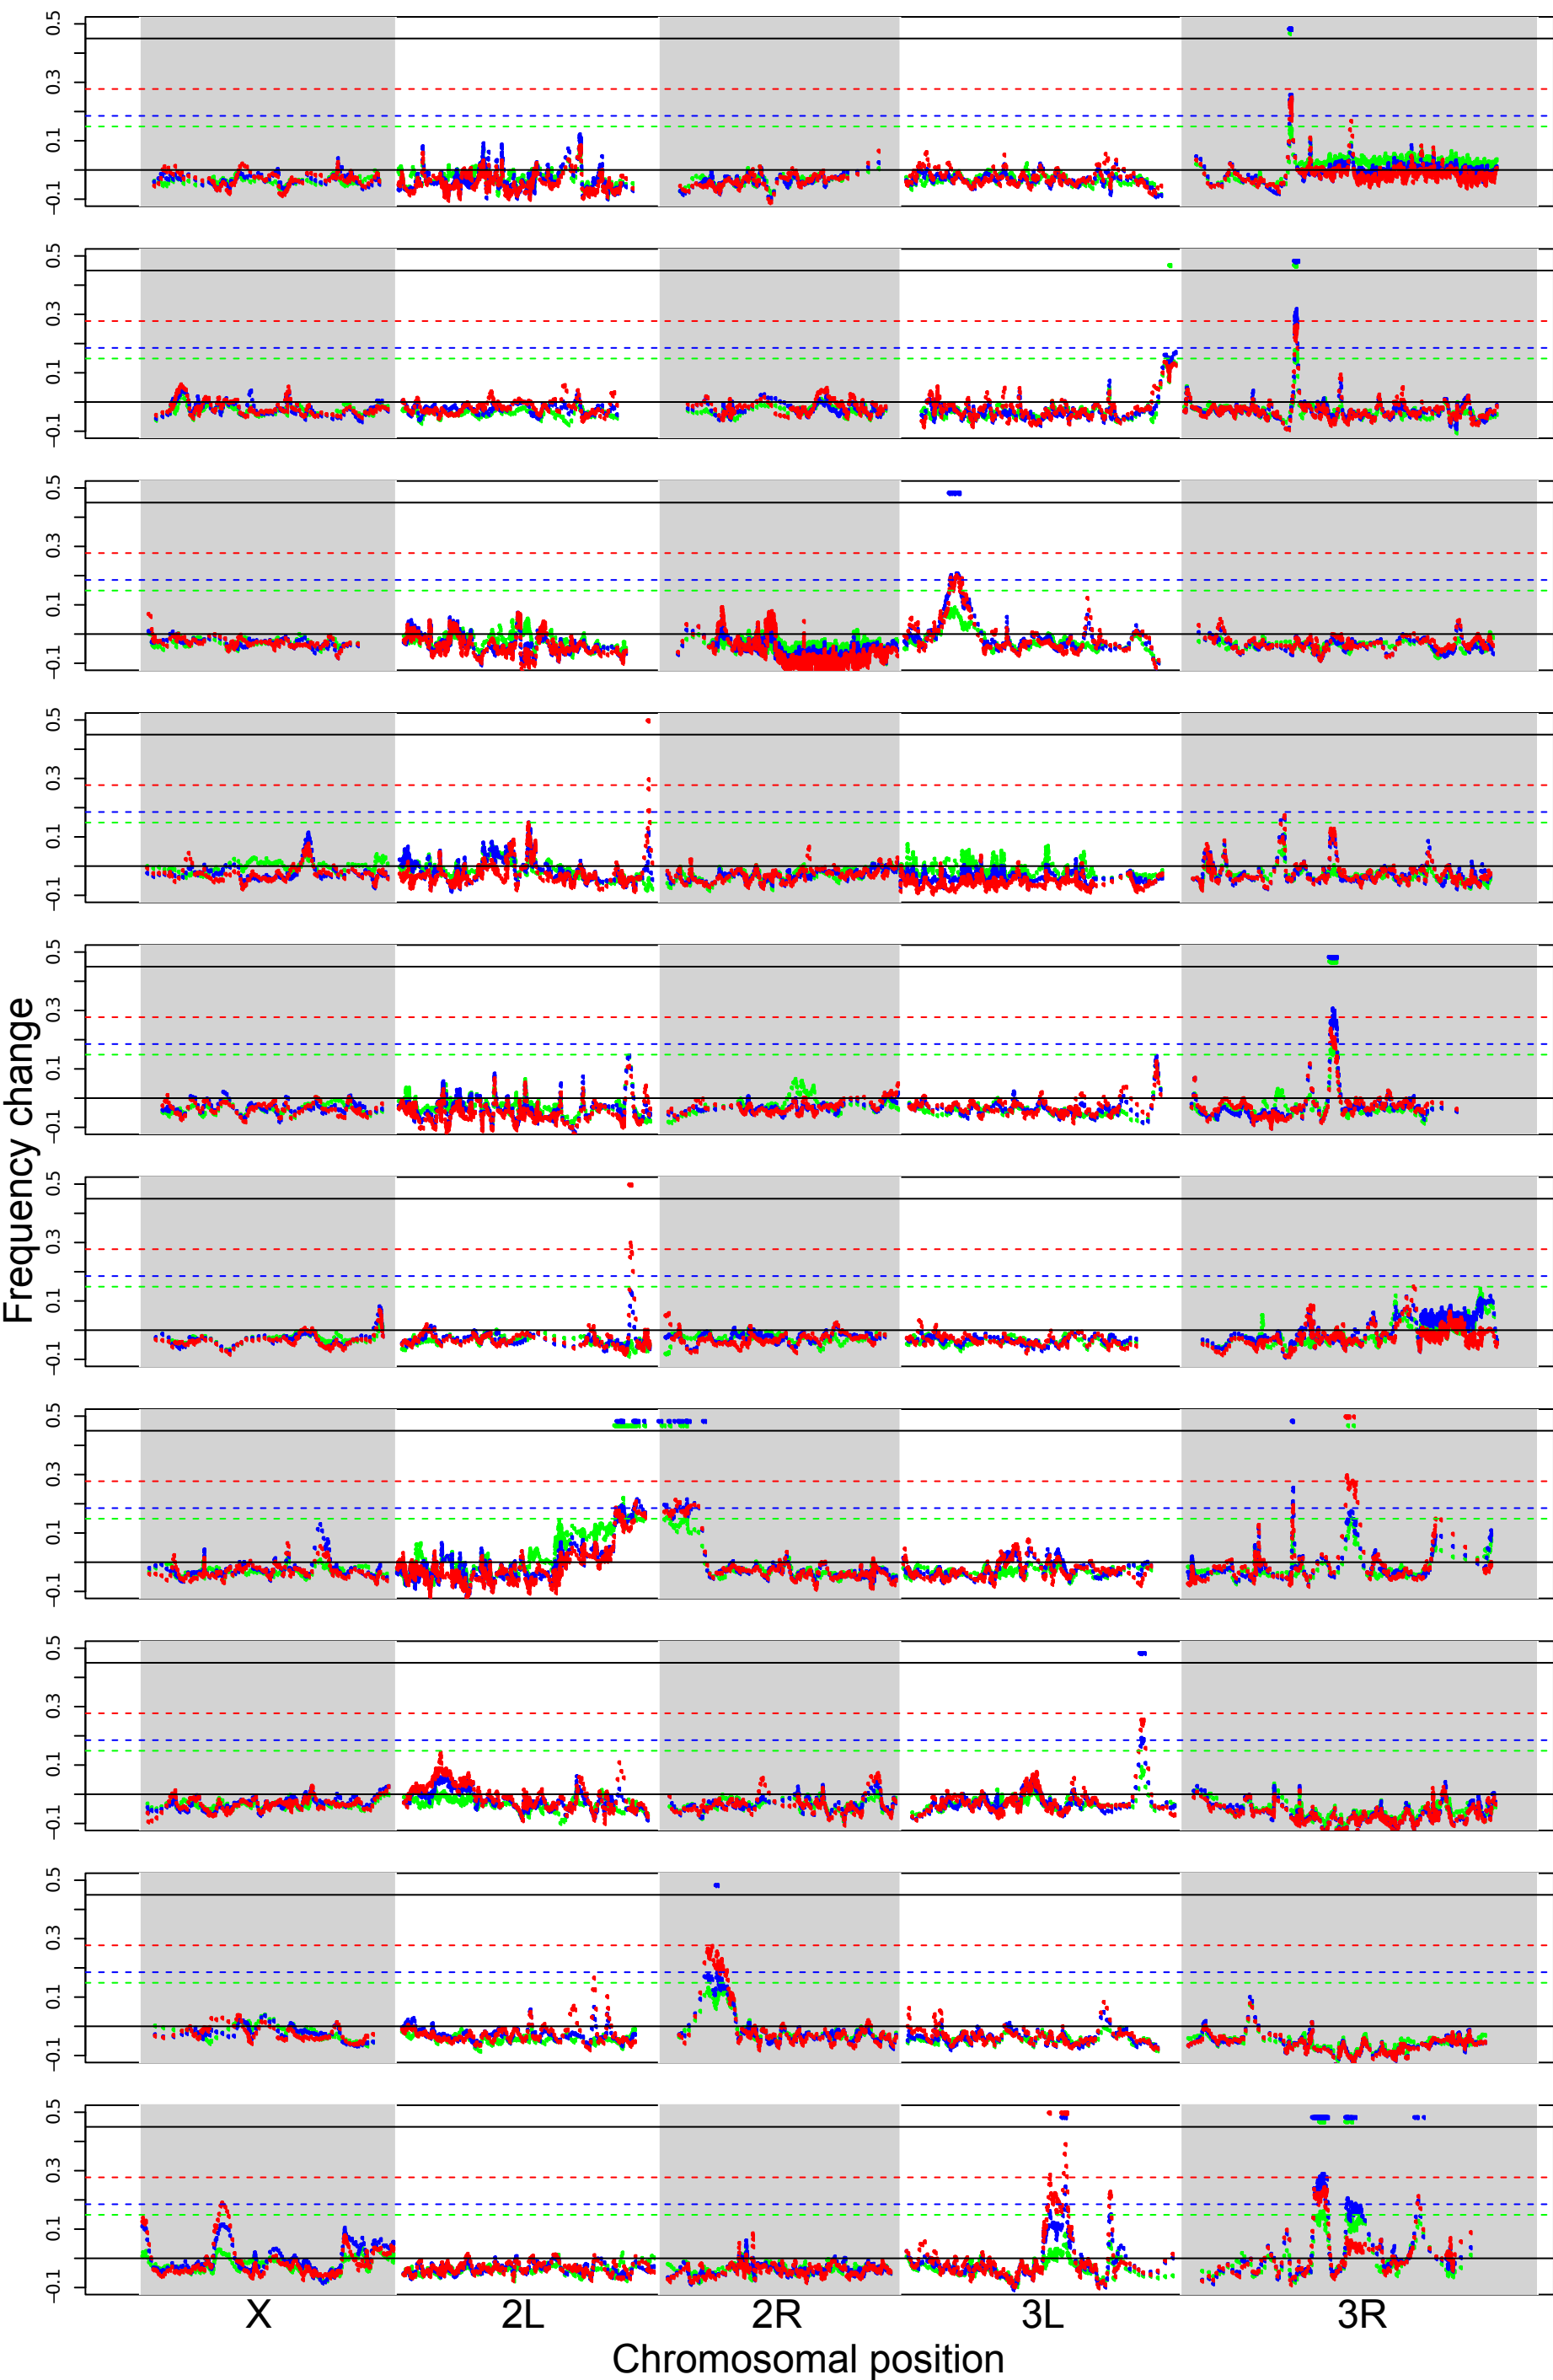

Supplement: supp_msu320_Supplementary_material_figures-S10.pdf [file supp_msu320_Supplementary_material_figures-S10.pdf]
